# Supplementary material for: Peptides derived from the histidine–proline rich glycoprotein bind copper ions and exhibit anti-angiogenic properties
Source: Royal Society of Chemistry journal article supplement (doi:10.1039/c8dt01560k), 2018-01-01
Supplement: c8dt01560k1.pdf [file c8dt01560k1.pdf]

## Peptides derived from histidine-proline rich glycoprotein bind copper ions and exhibit anti-angiogenic properties

Antonio Magri,<sup>a</sup> Giulia Grasso,<sup>a</sup> Federico Corti,<sup>b</sup> Federica Finetti,<sup>c</sup> Valentina Greco,<sup>d</sup> Anna Maria Santoro,<sup>a</sup> Sebastiano Sciuto,<sup>d</sup> Diego La Mendola,<sup>\*e</sup> Lucia Morbidelli<sup>\*f</sup> and Enrico Rizzarelli<sup>d</sup>

<sup>a</sup> Istituto di Biostrutture e Bioimmagini-CNR, Via P. Gaifami 18, 95126 Catania (Italy)

<sup>b</sup> Yale Cardiovascular Research Center, Yale University, New Haven (CT), (USA).

<sup>c</sup> Dipartimento di Biotecnologie, Chimica e Farmacia, Università di Siena, Via Aldo Moro, 2, 53100 Siena (Italy)

<sup>d</sup> Dipartimento di Scienze Chimiche, Università di Catania, Viale A.Doria 6, 95125 Catania (Italy).

<sup>e</sup> Dipartimento di Farmacia, Università di Pisa, Via Bonanno Pisano 6, 56126 Pisa (Italy).

E-mail: lamendola@farm.unipi.it

<sup>f</sup> Dipartimento di Scienze della Vita, Università di Siena, Via Aldo Moro, 2, 53100 Siena (Italy). E-mail: lucia.morbidelli@unisi.it

## Table of Contents

|                                                                                               |    |
|-----------------------------------------------------------------------------------------------|----|
| 1. Figure S1. ESI-MS spectrum of copper complexes with TetraHPRG                              | S2 |
| 2. Figure S2. EPR spectra of Cu-TetraHPRG at 1:1 molar ratio                                  | S3 |
| 3. Figure S3. EPR spectra of Cu-TetraHPRG at 2:1 molar ratio                                  | S4 |
| 4. Figure S4. UV-vis spectra of copper complexes with TH-TetraHPRG                            | S5 |
| 5. Figure S5. LC-MS spectra of TetraHPRG and TH-TetraHPRG                                     | S6 |
| 6. Figure S6. LC-MS spectra of TetraHPRG and TH-TetraHPRG Chymotrypsin proteolytic digestion. | S7 |

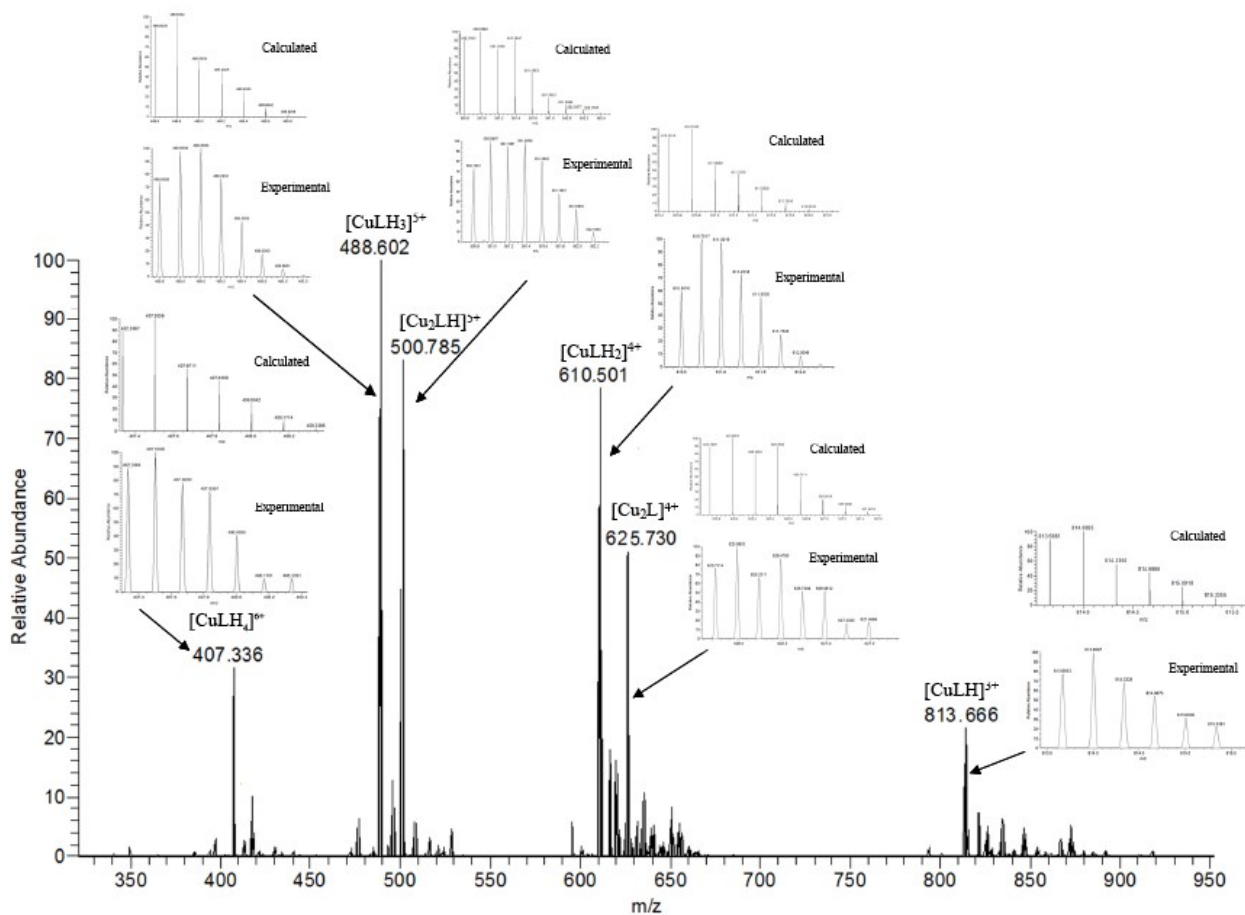

**Figure S1.** ESI-MS spectrum of aqueous solution of TetraHPRG/Cu(II) 1:1 ratio at pH 7 in positive ion mode. Experimental and calculated isotope patterns for the peaks at  $m/z=407.336$ ,  $488.602$ ,  $500.785$ ,  $610.501$ ,  $625.730$  and  $813.666$ .

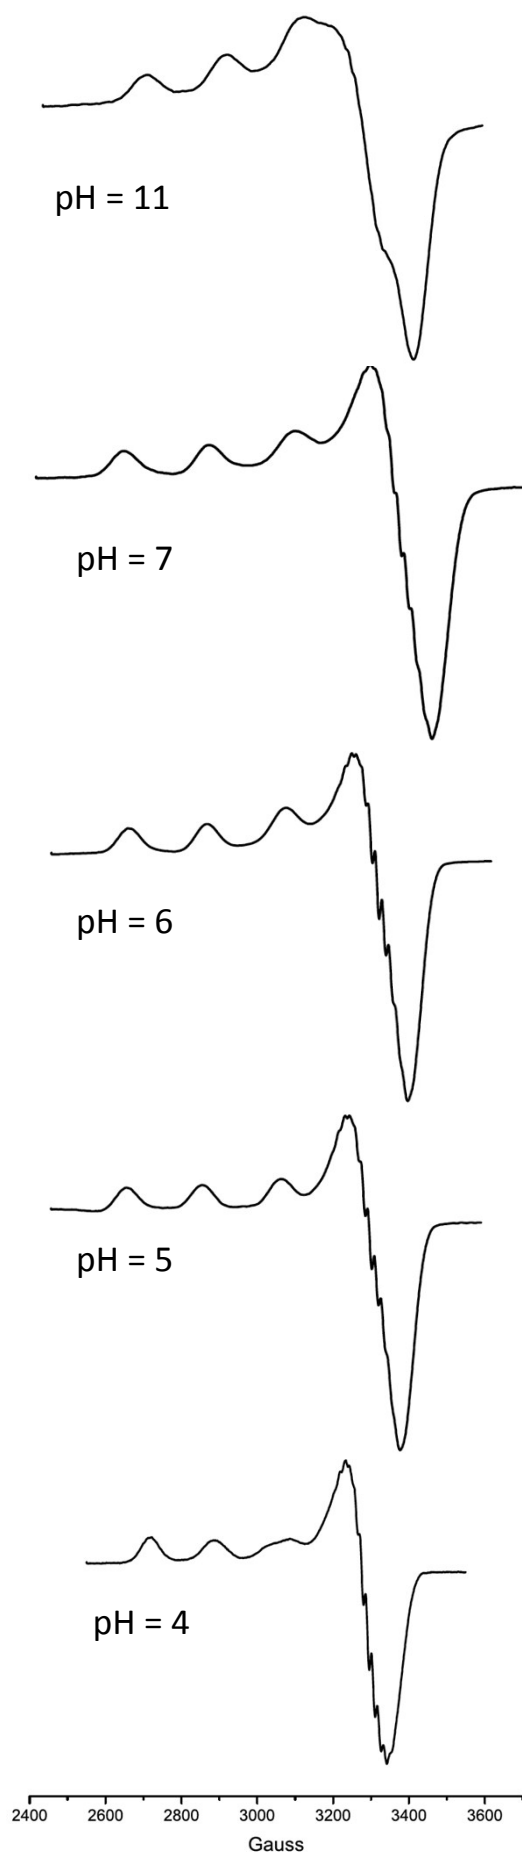

Figure S2. EPR spectra of Cu-TetraHPRG at 1:1 molar ratio.  $[Cu^{2+}] = 1 \times 10^{-3} M$

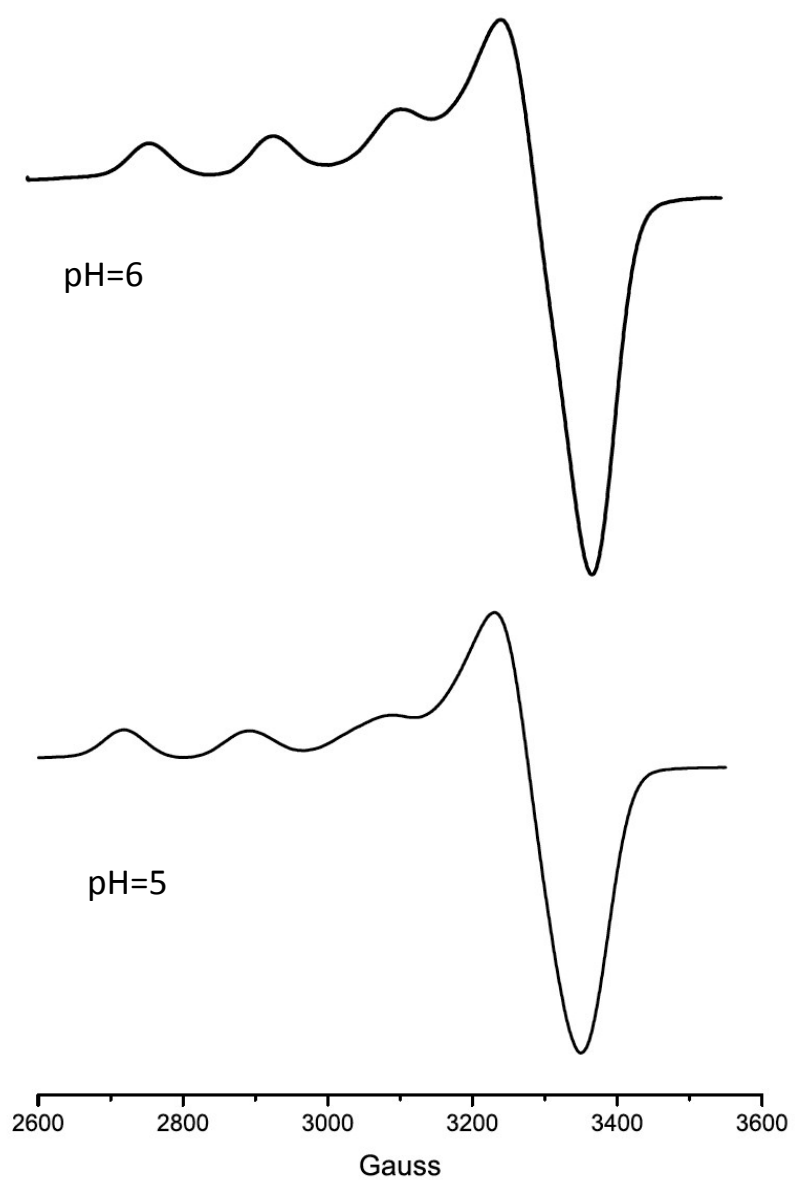

Figure S3. EPR spectra of Cu-TetraHPRG at 2:1 molar ratio.  $[\text{Cu}^{2+}] = 2 \times 10^{-3} \text{ M}$

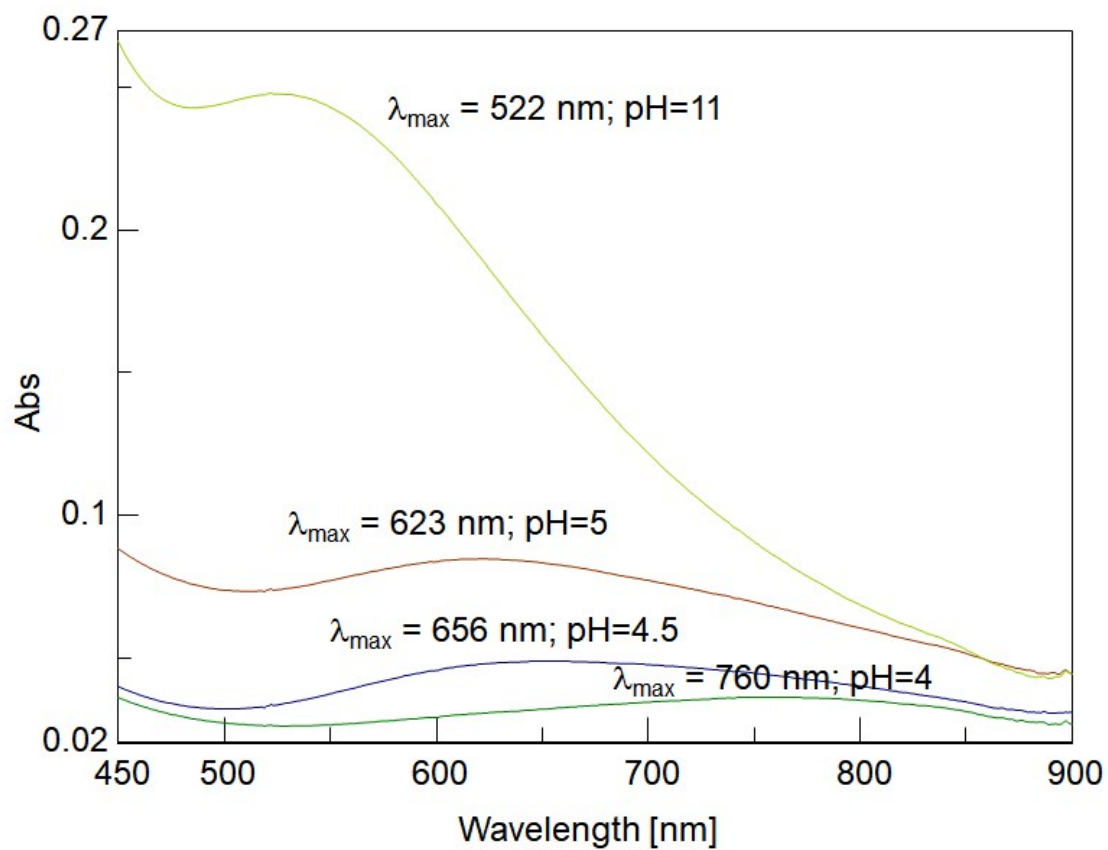

**Figure S4.** UV-vis spectra of Cu<sup>2+</sup> complexes with TH-TetraHPRG at 1:1 M/L molar ratio. [Cu<sup>2+</sup>]=[TH-TetraHPRG]= 1 × 10<sup>-3</sup> M.

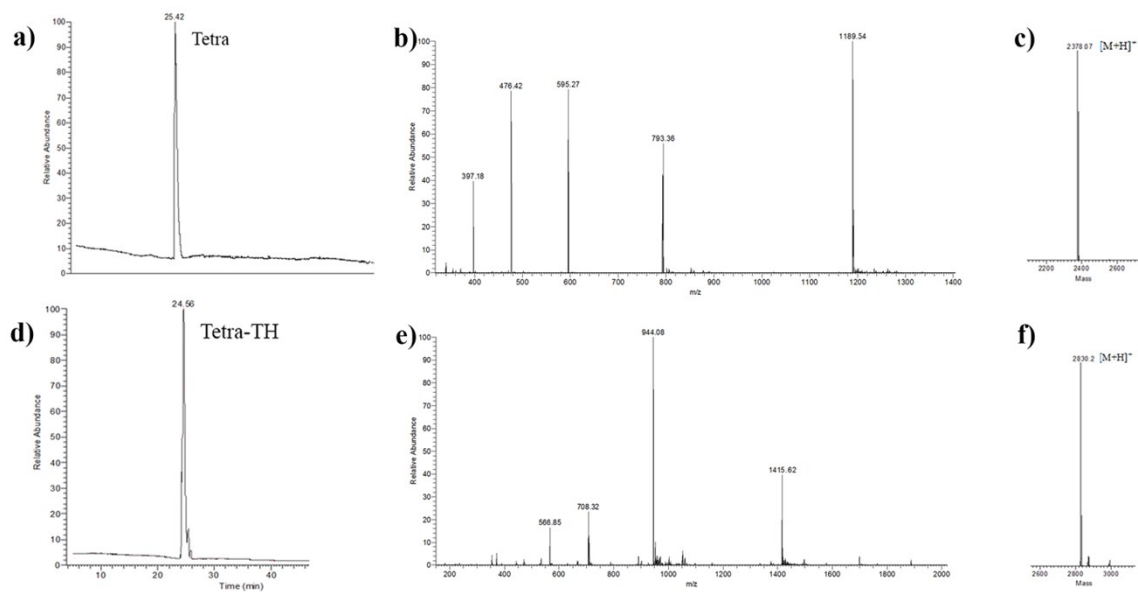

**Figure S5.** LC-MS (positive ions) analysis (Q-Exactive mass spectrometer Thermo coupled to a Ultimate 3000 HPLC system) of TetraHPRG and TH-TetraHPRG peptides (Easy Spray PepMap C18 Thermo column 15 cm  $\times$  75  $\mu$ m i.d., 3  $\mu$ m, 100  $\text{\AA}$ . HPLC method: (A) 0.1% formic acid and (B) acetonitrile/water 80:20 (v/v) containing 0.1% formic acid. The gradient was linear from 0 to 45% B over 60 min. a) Chromatogram of Tetra; b) Full mass spectrum of peak eluted at approximately 25.42 min; c) The deconvoluted ESI mass spectrum of b, using MagTran software program; d) Chromatogram of Tetra-TH; e) Full mass spectrum of peak eluted at approximately 24.56 min; f) The deconvoluted ESI mass spectrum of e, using MagTran software program.

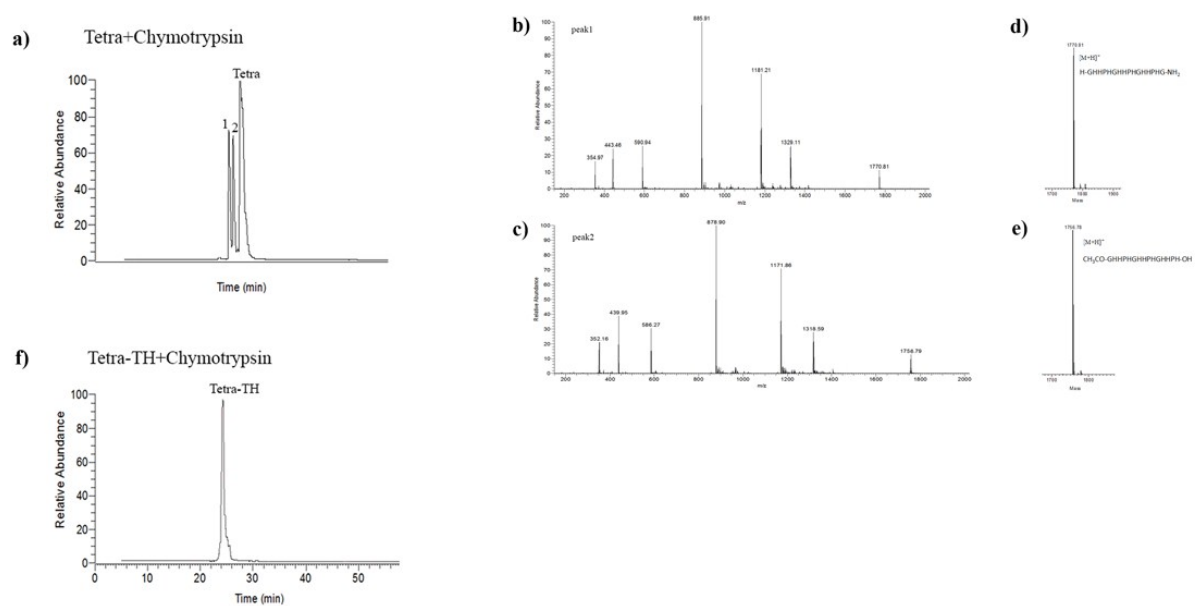

**Figure S6.** LC-MS (positive ions) analysis (Q-Exactive mass spectrometer Thermo coupled to a Ultimate 3000 HPLC system) of Chymotrypsin proteolytic digestion of TetraHPRG and TH-TetraHPRG peptides (Peptide/enzyme 200:1, Tris 50mM, pH 7.8 T=37°C for 2h. Easy Spray PepMap C18 Thermo column 15 cm  $\times$  75  $\mu$ m i.d., 3  $\mu$ m, 100 Å. HPLC method: (A) 0.1% formic acid and (B) acetonitrile/water 80:20 (v/v) containing 0.1% formic acid. The gradient was linear from 0 to 45% B over 60 min. a) Chromatogram of TetraHPRG+Chymotrypsin; b) Full mass spectrum of peak eluted at approximately 23.04 min; c) Full mass spectrum of peak eluted at approximately 23.51 min; d) The deconvoluted ESI mass spectrum of b using MagTran software program; e) The deconvoluted ESI mass spectrum of c using MagTran software program; f) Chromatogram of TH-TetraHPRG + Chymotrypsin.
